# Supplementary material for: Peak Response Prediction for RC Beams under Impact Loading
Source: Hindawi journal article supplement (doi:10.1155/2019/6813693), 2019-01-01
Supplement: f1 [file 6813693.f1.pdf]

## Supplementary Materials

Appendix 1 Summary of experimental studies on the impact behavior of RC beams

| Number | Specimen | Geometric size |             |             |               |               | Concrete        | Longitudinal reinforcement  |                |                              |                 | Shear reinforcement |                 | Hammer       |             | Test results  |                   |               | Reference |
|--------|----------|----------------|-------------|-------------|---------------|---------------|-----------------|-----------------------------|----------------|------------------------------|-----------------|---------------------|-----------------|--------------|-------------|---------------|-------------------|---------------|-----------|
|        |          | $b$<br>(mm)    | $h$<br>(mm) | $l$<br>(mm) | $l_n$<br>(mm) | $a_s$<br>(mm) | $f'_c$<br>(MPa) | $A_s$<br>(mm <sup>2</sup> ) | $f_y$<br>(MPa) | $A'_s$<br>(mm <sup>2</sup> ) | $f'_y$<br>(MPa) | $f_{vy}$<br>(MPa)   | $\rho_v$<br>(%) | $V$<br>(m/s) | $M$<br>(kg) | $F_p$<br>(kN) | $S_{max}$<br>(mm) | Failure model |           |
| T1     | A37      | 200            | 400         | 2400        | 2000          | 50            | 41.2            | 1924                        | 373            | 1924                         | 373             | 373                 | 0.21            | 3.67         | 384         | 750           | 8.1               | Flexure       | [35]      |
| T2     | A46      | 200            | 400         | 2400        | 2000          | 50            | 41.2            | 1924                        | 373            | 1924                         | 373             | 373                 | 0.21            | 4.58         | 384         | 880           | 10.1              | Flexure       |           |
| T3     | A56      | 200            | 400         | 2400        | 2000          | 50            | 41.2            | 1924                        | 373            | 1924                         | 373             | 373                 | 0.21            | 5.61         | 384         | 1000          | 13.1              | Flexure-shear |           |
| T4     | A65      | 200            | 400         | 2400        | 2000          | 50            | 41.2            | 1924                        | 373            | 1924                         | 373             | 373                 | 0.21            | 6.52         | 384         | 1110          | 16.0              | Shear         |           |
| T5     | A74      | 200            | 400         | 2400        | 2000          | 50            | 41.2            | 1924                        | 373            | 1924                         | 373             | 373                 | 0.21            | 7.42         | 384         | 1290          | 22.0              | Shear         |           |
| T6     | A84      | 200            | 400         | 2400        | 2000          | 50            | 41.2            | 1924                        | 373            | 1924                         | 373             | 373                 | 0.21            | 8.40         | 384         | 1400          | 24.4              | Shear         |           |
| T7     | B37      | 200            | 400         | 2400        | 2000          | 50            | 41.2            | 1924                        | 373            | 1924                         | 373             | 373                 | 0.42            | 3.67         | 384         | 760           | 7.5               | Flexure       |           |
| T8     | B46      | 200            | 400         | 2400        | 2000          | 50            | 41.2            | 1924                        | 373            | 1924                         | 373             | 373                 | 0.42            | 4.58         | 384         | 900           | 11.3              | Flexure-shear |           |
| T9     | B65      | 200            | 400         | 2400        | 2000          | 50            | 41.2            | 1924                        | 373            | 1924                         | 373             | 373                 | 0.42            | 6.52         | 384         | 1200          | 16.0              | Shear         |           |
| T10    | B74      | 200            | 400         | 2400        | 2000          | 50            | 41.2            | 1924                        | 373            | 1924                         | 373             | 373                 | 0.42            | 7.42         | 384         | 1280          | 19.8              | Flexure-shear |           |
| T11    | B84      | 200            | 400         | 2400        | 2000          | 50            | 41.2            | 1924                        | 373            | 1924                         | 373             | 373                 | 0.42            | 8.40         | 384         | 1416          | 24.0              | Flexure-shear |           |
| T12    | B93      | 200            | 400         | 2400        | 2000          | 50            | 41.2            | 1924                        | 373            | 1924                         | 373             | 373                 | 0.42            | 9.30         | 384         | 1575          | 28.0              | Flexure-shear |           |
| T13    | S1616-1  | 150            | 250         | 1700        | 1400          | 40            | 42.0            | 402                         | 426            | 402                          | 426             | 295                 | 1.40            | 1.73         | 400         | 125           | 5.9               | None          | [1]       |
| T14    | S1616-2  | 150            | 250         | 1700        | 1400          | 40            | 42.0            | 402                         | 426            | 402                          | 426             | 295                 | 1.40            | 2.45         | 400         | 180           | 11.0              | None          |           |
| T15    | S1616-3  | 150            | 250         | 1700        | 1400          | 40            | 42.0            | 402                         | 426            | 402                          | 426             | 295                 | 1.40            | 3.46         | 400         | 248           | 20.1              | Flexure       |           |
| T16    | S1616-4  | 150            | 250         | 1700        | 1400          | 40            | 42.0            | 402                         | 426            | 402                          | 426             | 295                 | 1.40            | 4.85         | 400         | 317           | 36.2              | Flexure       |           |
| T17    | S1322-1  | 150            | 250         | 1700        | 1400          | 40            | 42.0            | 760                         | 397            | 265                          | 397             | 295                 | 1.40            | 2.45         | 400         | 190           | 7.8               | None          |           |
| T18    | S1322-2  | 150            | 250         | 1700        | 1400          | 40            | 42.0            | 760                         | 397            | 265                          | 397             | 295                 | 1.40            | 3.46         | 400         | 260           | 11.4              | Flexure       |           |
| T19    | S1322-3  | 150            | 250         | 1700        | 1400          | 40            | 42.0            | 760                         | 397            | 265                          | 397             | 295                 | 1.40            | 4.85         | 400         | 305           | 23.5              | Flexure       |           |
| T20    | S1322-4  | 150            | 250         | 1700        | 1400          | 40            | 42.0            | 760                         | 397            | 265                          | 397             | 295                 | 1.40            | 6.86         | 400         | 340           | 27.0              | Flexure       |           |
| T21    | S2222-1  | 150            | 250         | 1700        | 1400          | 40            | 42.0            | 760                         | 418            | 760                          | 418             | 295                 | 1.40            | 2.45         | 400         | 200           | 7.0               | None          |           |
| T22    | S2222-2  | 150            | 250         | 1700        | 1400          | 40            | 42.0            | 760                         | 418            | 760                          | 418             | 295                 | 1.40            | 3.46         | 400         | 260           | 11.0              | Flexure       |           |
| T23    | S2222-3  | 150            | 250         | 1700        | 1400          | 40            | 42.0            | 760                         | 418            | 760                          | 418             | 295                 | 1.40            | 4.85         | 400         | 313           | 21.4              | Flexure       |           |
| T24    | S2222-4  | 150            | 250         | 1700        | 1400          | 40            | 42.0            | 760                         | 418            | 760                          | 418             | 295                 | 1.40            | 6.86         | 400         | 388           | 31.8              | Flexure       |           |

## Appendix 1 (Continued)

| Number | Specimen | Geometric size |             |             |               |               | Concrete        | Longitudinal reinforcement  |                |                              |                 | Shear reinforcement |                 | Hammer       |             | Test results  |                   |               | Reference |
|--------|----------|----------------|-------------|-------------|---------------|---------------|-----------------|-----------------------------|----------------|------------------------------|-----------------|---------------------|-----------------|--------------|-------------|---------------|-------------------|---------------|-----------|
|        |          | $b$<br>(mm)    | $h$<br>(mm) | $l$<br>(mm) | $l_n$<br>(mm) | $a_s$<br>(mm) | $f'_c$<br>(MPa) | $A_s$<br>(mm <sup>2</sup> ) | $f_y$<br>(MPa) | $A'_s$<br>(mm <sup>2</sup> ) | $f'_y$<br>(MPa) | $f_{vy}$<br>(MPa)   | $\rho_v$<br>(%) | $V$<br>(m/s) | $M$<br>(kg) | $F_p$<br>(kN) | $S_{max}$<br>(mm) | Failure model |           |
| T25    | A1       | 150            | 250         | 1400        | 1000          | 40            | 24.0            | 265                         | 345            | 265                          | 345             | 295                 | 0.75            | 5.00         | 300         | 434           | 24.1              | n/p           | [2]       |
| T26    | A2-1     | 150            | 250         | 2400        | 2000          | 40            | 24.0            | 265                         | 345            | 265                          | 345             | 295                 | 0.75            | 3.46         | 150         | 321           | 13.6              | Flexure       |           |
| T27    | A2-2     | 150            | 250         | 2400        | 2000          | 40            | 24.0            | 265                         | 345            | 265                          | 345             | 295                 | 0.75            | 2.45         | 300         | 293           | 25.4              | Flexure       |           |
| T28    | A2-3     | 150            | 250         | 2400        | 2000          | 40            | 24.0            | 265                         | 345            | 265                          | 345             | 295                 | 0.75            | 2.00         | 450         | 245           | 37.0              | Flexure       |           |
| T29    | A2-4     | 150            | 250         | 2400        | 2000          | 40            | 24.0            | 265                         | 345            | 265                          | 345             | 295                 | 0.75            | 4.90         | 150         | 453           | 16.3              | Flexure       |           |
| T30    | A2-5     | 150            | 250         | 2400        | 2000          | 40            | 24.0            | 265                         | 345            | 265                          | 345             | 295                 | 0.75            | 3.50         | 300         | 417           | 31.6              | Flexure       |           |
| T31    | A2-6     | 150            | 250         | 2400        | 2000          | 40            | 24.0            | 265                         | 345            | 265                          | 345             | 295                 | 0.75            | 2.80         | 450         | 346           | 43.7              | Flexure       |           |
| T32    | A2-7     | 150            | 250         | 2400        | 2000          | 40            | 24.0            | 265                         | 345            | 265                          | 345             | 295                 | 0.75            | 6.00         | 150         | 573           | 17.9              | Flexure       |           |
| T33    | A2-8     | 150            | 250         | 2400        | 2000          | 40            | 24.0            | 265                         | 345            | 265                          | 345             | 295                 | 0.75            | 4.24         | 300         | 513           | 33.3              | Flexure       |           |
| T34    | A2-9     | 150            | 250         | 2400        | 2000          | 40            | 24.0            | 265                         | 345            | 265                          | 345             | 295                 | 0.75            | 3.46         | 450         | 445           | 48.4              | Flexure       |           |
| T35    | A2-10    | 150            | 250         | 2400        | 2000          | 40            | 24.0            | 265                         | 345            | 265                          | 345             | 295                 | 0.75            | 1.00         | 300         | 65            | 4.5               | Flexure       |           |
| T36    | A2-11    | 150            | 250         | 2400        | 2000          | 40            | 24.0            | 265                         | 345            | 265                          | 345             | 295                 | 0.75            | 2.00         | 300         | 253           | 12.6              | Flexure       |           |
| T37    | A2-12    | 150            | 250         | 2400        | 2000          | 40            | 24.0            | 265                         | 345            | 265                          | 345             | 295                 | 0.75            | 3.00         | 300         | 426           | 26.9              | Flexure       |           |
| T38    | A2-13    | 150            | 250         | 2400        | 2000          | 40            | 24.0            | 265                         | 345            | 265                          | 345             | 295                 | 0.75            | 4.00         | 300         | 489           | 41.4              | Flexure       |           |
| T39    | A2-14    | 150            | 250         | 2400        | 2000          | 40            | 24.0            | 265                         | 345            | 265                          | 345             | 295                 | 0.75            | 5.00         | 300         | 466           | 58.3              | Flexure       |           |
| T40    | A4       | 150            | 250         | 4400        | 4000          | 40            | 24.0            | 265                         | 345            | 265                          | 345             | 295                 | 0.75            | 5.00         | 300         | 452           | 114.9             | n/p           | [38]      |
| T41    | B        | 300            | 150         | 2400        | 2000          | 40            | 24.0            | 530                         | 345            | 530                          | 345             | 295                 | 0.75            | 5.00         | 300         | 667           | 77.0              | n/p           |           |
| T42    | C        | 150            | 250         | 2400        | 2000          | 40            | 24.0            | 402                         | 345            | 402                          | 345             | 295                 | 0.75            | 5.00         | 300         | 650           | 42.4              | n/p           |           |
| T43    | D        | 150            | 250         | 2400        | 2000          | 40            | 24.0            | 157                         | 345            | 157                          | 345             | 295                 | 0.75            | 5.00         | 300         | 639           | 94.0              | n/p           |           |
| T44    | E        | 150            | 400         | 2400        | 2000          | 40            | 24.0            | 265                         | 345            | 265                          | 345             | 295                 | 0.75            | 5.00         | 300         | 742           | 29.1              | n/p           |           |
| T45    | F        | 150            | 400         | 2400        | 2000          | 40            | 24.0            | 157                         | 345            | 157                          | 345             | 295                 | 0.75            | 5.00         | 300         | 664           | 43.9              | n/p           |           |
| T46    | BD1      | 150            | 310         | 3000        | 1860          | 33            | 45.8            | 603                         | 394            | 0                            | 394             | 0                   | 0.00            | 4.43         | 333         | 912           | n/p               | Shear         |           |
| T47    | BD2      | 150            | 310         | 3000        | 1860          | 33            | 45.8            | 603                         | 394            | 0                            | 394             | 0                   | 0.00            | 8.85         | 333         | 1708          | n/p               | Shear         |           |
| T48    | BD3      | 150            | 310         | 3000        | 1860          | 33            | 45.8            | 603                         | 394            | 0                            | 394             | 0                   | 0.00            | 5.71         | 200         | 1184          | n/p               | Shear         |           |
| T49    | BD4      | 150            | 310         | 3000        | 1860          | 33            | 45.8            | 603                         | 394            | 0                            | 394             | 0                   | 0.00            | 4.43         | 200         | 768           | n/p               | Flexure       |           |
| T50    | BD5      | 150            | 310         | 3000        | 1860          | 33            | 45.8            | 603                         | 394            | 0                            | 394             | 0                   | 0.00            | 5.71         | 200         | 1360          | n/p               | Flexure-shear |           |

## Appendix 1 (Continued)

| Number | Specimen | Geometric size |             |             |               |               | Concrete        | Longitudinal reinforcement  |                |                              |                 | Shear reinforcement |                 | Hammer       |             | Test results  |                   |               | Reference |
|--------|----------|----------------|-------------|-------------|---------------|---------------|-----------------|-----------------------------|----------------|------------------------------|-----------------|---------------------|-----------------|--------------|-------------|---------------|-------------------|---------------|-----------|
|        |          | $b$<br>(mm)    | $h$<br>(mm) | $l$<br>(mm) | $l_n$<br>(mm) | $a_s$<br>(mm) | $f'_c$<br>(MPa) | $A_s$<br>(mm <sup>2</sup> ) | $f_y$<br>(MPa) | $A'_s$<br>(mm <sup>2</sup> ) | $f'_y$<br>(MPa) | $f_{vy}$<br>(MPa)   | $\rho_v$<br>(%) | $V$<br>(m/s) | $M$<br>(kg) | $F_p$<br>(kN) | $S_{max}$<br>(mm) | Failure model |           |
| T51    | G1-1     | 200            | 300         | 3400        | 3000          | 40            | 33.7            | 567                         | 379            | 567                          | 379             | 295                 | 0.07            | 7.00         | 300         | 1496          | 64.3              | n/p           | [10]      |
| T52    | G1-1S    | 200            | 300         | 3400        | 3000          | 40            | 33.7            | 567                         | 379            | 567                          | 379             | 295                 | 0.07            | 7.00         | 300         | 1601          | 58.0              | n/p           |           |
| T53    | G2-1     | 150            | 250         | 2400        | 2000          | 40            | 32.2            | 265                         | 373            | 265                          | 373             | 295                 | 0.13            | 4.00         | 300         | 510           | 28.3              | n/p           |           |
| T54    | G2-2     | 150            | 250         | 2400        | 2000          | 40            | 32.2            | 265                         | 373            | 265                          | 373             | 295                 | 0.13            | 5.00         | 300         | 779           | 44.0              | n/p           |           |
| T55    | G2-3     | 150            | 250         | 2400        | 2000          | 40            | 32.2            | 265                         | 373            | 265                          | 373             | 295                 | 0.13            | 6.00         | 300         | 854           | 57.0              | n/p           |           |
| T56    | G2L-1    | 150            | 250         | 2400        | 2000          | 40            | 32.2            | 265                         | 373            | 265                          | 373             | 295                 | 0.13            | 4.00         | 400         | 447           | 44.2              | Flexure       |           |
| T57    | G2L-2    | 150            | 250         | 2400        | 2000          | 40            | 32.2            | 265                         | 373            | 265                          | 373             | 295                 | 0.13            | 5.00         | 400         | 668           | 66.8              | Flexure       |           |
| T58    | G2L-3    | 150            | 250         | 2400        | 2000          | 40            | 32.2            | 265                         | 373            | 265                          | 373             | 295                 | 0.13            | 6.00         | 400         | 787           | 89.7              | Flexure       |           |
| T59    | G3-1     | 150            | 250         | 2400        | 2000          | 40            | 34.6            | 265                         | 393            | 265                          | 393             | 295                 | 0.13            | 4.00         | 300         | 609           | 36.7              | n/p           |           |
| T60    | G3-2     | 150            | 250         | 2400        | 2000          | 40            | 34.6            | 265                         | 393            | 265                          | 393             | 295                 | 0.13            | 5.00         | 300         | 770           | 52.0              | n/p           |           |
| T61    | G3-3     | 150            | 250         | 2400        | 2000          | 40            | 34.6            | 265                         | 393            | 265                          | 393             | 295                 | 0.13            | 6.00         | 300         | 839           | 70.6              | n/p           |           |
| T62    | G4-1     | 150            | 250         | 2400        | 2000          | 40            | 32.3            | 265                         | 373            | 265                          | 373             | 295                 | 0.13            | 4.00         | 300         | 800           | 39.7              | n/p           |           |
| T63    | G4-2     | 150            | 250         | 2400        | 2000          | 40            | 32.3            | 265                         | 373            | 265                          | 373             | 295                 | 0.13            | 5.00         | 300         | 986           | 56.1              | n/p           |           |
| T64    | G5-1     | 200            | 300         | 3400        | 3000          | 40            | 39.2            | 567                         | 379            | 567                          | 379             | 295                 | 0.07            | 6.00         | 400         | 1313          | 63.5              | Flexure       |           |
| T65    | G5-2     | 200            | 300         | 3400        | 3000          | 40            | 39.2            | 567                         | 379            | 567                          | 379             | 295                 | 0.07            | 7.00         | 400         | 1557          | 83.4              | Flexure       |           |
| T66    | G6-1     | 250            | 250         | 2400        | 2000          | 40            | 34.7            | 567                         | 392            | 567                          | 392             | 295                 | 0.13            | 5.00         | 300         | 1336          | 26.4              | n/p           |           |
| T67    | G7-1     | 250            | 250         | 3400        | 3000          | 40            | 34.7            | 567                         | 392            | 567                          | 392             | 295                 | 0.09            | 5.00         | 300         | 1243          | 45.8              | n/p           |           |
| T68    | G7-2     | 250            | 250         | 3400        | 3000          | 40            | 34.7            | 567                         | 392            | 567                          | 392             | 295                 | 0.09            | 6.00         | 300         | 1588          | 60.9              | n/p           |           |
| T69    | G8-1     | 200            | 200         | 2400        | 2000          | 40            | 34.7            | 982                         | 383            | 982                          | 383             | 295                 | 0.16            | 6.00         | 300         | 1192          | 36.5              | n/p           |           |
| T70    | G9-1     | 200            | 200         | 3400        | 3000          | 40            | 34.7            | 982                         | 383            | 982                          | 383             | 295                 | 0.12            | 5.00         | 300         | 931           | 43.2              | n/p           |           |
| T71    | G9-2     | 200            | 200         | 3400        | 3000          | 40            | 34.7            | 982                         | 383            | 982                          | 383             | 295                 | 0.12            | 6.00         | 300         | 1103          | 57.9              | n/p           |           |
| T72    | G10-1    | 200            | 250         | 3400        | 3000          | 40            | 23.5            | 567                         | 404            | 567                          | 404             | 295                 | 0.09            | 4.00         | 300         | 751           | 33.7              | None          |           |
| T73    | G10-2    | 200            | 250         | 3400        | 3000          | 40            | 23.5            | 567                         | 404            | 567                          | 404             | 295                 | 0.09            | 5.00         | 300         | 922           | 49.5              | Flexure       |           |
| T74    | G10-3    | 200            | 250         | 3400        | 3000          | 40            | 23.5            | 567                         | 404            | 567                          | 404             | 295                 | 0.09            | 6.00         | 300         | 1017          | 67.8              | Flexure       |           |
| T75    | G10-4    | 200            | 250         | 3400        | 3000          | 40            | 23.5            | 567                         | 404            | 567                          | 404             | 295                 | 0.09            | 7.00         | 300         | 1042          | 83.9              | Flexure       |           |
| T76    | G11-1    | 200            | 300         | 3100        | 2700          | 50            | 23.6            | 760                         | 401            | 760                          | 401             | 295                 | 0.08            | 3.13         | 500         | 703           | 20.5              | n/p           |           |

## Appendix 1 (Continued)

| Number | Specimen    | Geometric size |             |             |               |               | Concrete        | Longitudinal reinforcement  |                |                              |                 | Shear reinforcement |                 | Hammer       |             | Test results  |                   |               | Reference |
|--------|-------------|----------------|-------------|-------------|---------------|---------------|-----------------|-----------------------------|----------------|------------------------------|-----------------|---------------------|-----------------|--------------|-------------|---------------|-------------------|---------------|-----------|
|        |             | $b$<br>(mm)    | $h$<br>(mm) | $l$<br>(mm) | $l_n$<br>(mm) | $a_s$<br>(mm) | $f'_c$<br>(MPa) | $A_s$<br>(mm <sup>2</sup> ) | $f_y$<br>(MPa) | $A'_s$<br>(mm <sup>2</sup> ) | $f'_y$<br>(MPa) | $f_{vy}$<br>(MPa)   | $\rho_v$<br>(%) | $V$<br>(m/s) | $M$<br>(kg) | $F_p$<br>(kN) | $S_{max}$<br>(mm) | Failure model |           |
| T77    | G11-2       | 200            | 300         | 3100        | 2700          | 50            | 23.6            | 760                         | 401            | 760                          | 401             | 295                 | 0.08            | 4.20         | 500         | 971           | 33.2              | n/p           | [10]      |
| T78    | G11-3       | 200            | 300         | 3100        | 2700          | 50            | 23.6            | 760                         | 401            | 760                          | 401             | 295                 | 0.08            | 5.05         | 500         | 1462          | 43.1              | n/p           |           |
| T79    | G11-4       | 200            | 300         | 3100        | 2700          | 50            | 23.6            | 760                         | 401            | 760                          | 401             | 295                 | 0.08            | 5.78         | 500         | 1878          | 55.5              | n/p           |           |
| T80    | G11-5       | 200            | 300         | 3100        | 2700          | 50            | 23.6            | 760                         | 401            | 760                          | 401             | 295                 | 0.08            | 6.42         | 500         | 1765          | 67.2              | n/p           |           |
| T81    | G11-6       | 200            | 300         | 3100        | 2700          | 50            | 23.6            | 760                         | 401            | 760                          | 401             | 295                 | 0.08            | 7.00         | 500         | 1907          | 83.4              | n/p           |           |
| T82    | G12-1       | 200            | 300         | 3100        | 2700          | 50            | 23.6            | 1473                        | 407            | 1473                         | 407             | 295                 | 0.08            | 7.67         | 500         | 1675          | 85.4              | n/p           |           |
| T83    | G13-1       | 200            | 400         | 3100        | 2700          | 50            | 23.6            | 982                         | 406            | 982                          | 406             | 295                 | 0.06            | 7.67         | 500         | 2150          | 60.6              | n/p           |           |
| T84    | G14-1       | 200            | 350         | 3100        | 2700          | 50            | 23.6            | 982                         | 406            | 982                          | 406             | 295                 | 0.07            | 7.67         | 500         | 2258          | 63.7              | n/p           |           |
| T85    | G15-1       | 200            | 400         | 3100        | 2700          | 50            | 23.6            | 982                         | 406            | 982                          | 406             | 295                 | 0.06            | 7.67         | 500         | 2063          | 40.5              | n/p           |           |
| T86    | G16-1       | 200            | 370         | 3100        | 2700          | 50            | 23.6            | 982                         | 406            | 982                          | 406             | 295                 | 0.06            | 7.67         | 500         | 2023          | 52.9              | n/p           |           |
| T87    | B1          | 200            | 400         | 2800        | 2400          | 42            | 20.1            | 982                         | 429            | 402                          | 429             | 314                 | 0.50            | 5.90         | 253         | 1500          | 12.4              | Flexure-shear | [41]      |
| T88    | B2          | 200            | 400         | 2800        | 2400          | 42            | 20.1            | 982                         | 429            | 402                          | 429             | 314                 | 0.50            | 15.20        | 253         | 2203          | 79.8              | Flexure       |           |
| T89    | B3          | 200            | 400         | 2800        | 2400          | 42            | 20.1            | 982                         | 429            | 402                          | 429             | 314                 | 0.50            | 7.20         | 393         | 1689          | 44.8              | Flexure       |           |
| T90    | B4          | 200            | 400         | 2800        | 2400          | 42            | 38.5            | 1473                        | 429            | 402                          | 429             | 0                   | 0.00            | 7.20         | 393         | 2014          | 142.6             | Shear         |           |
| T91    | B5          | 200            | 400         | 2800        | 2400          | 42            | 38.5            | 1473                        | 429            | 402                          | 429             | 314                 | 0.50            | 7.20         | 393         | 1948          | 20.3              | Flexure       |           |
| T92    | B6          | 200            | 400         | 2800        | 2400          | 42            | 38.5            | 1473                        | 429            | 402                          | 429             | 314                 | 0.25            | 7.20         | 393         | 2214          | 31.4              | Flexure-shear |           |
| T93    | B-1700-4.60 | 200            | 500         | 6000        | 5000          | 40            | 27.0            | 1257                        | 495            | 402                          | 495             | 344                 | 0.09            | 4.60         | 1700        | 1360          | 83.7              | Flexure       | [7]       |
| T94    | B-1052-6.40 | 200            | 500         | 6000        | 5000          | 40            | 27.9            | 1257                        | 495            | 402                          | 495             | 344                 | 0.09            | 6.40         | 1052        | 1900          | 79.3              | Flexure-shear |           |
| T95    | B-868-7.14  | 200            | 500         | 6000        | 5000          | 40            | 24.8            | 1257                        | 495            | 402                          | 495             | 344                 | 0.09            | 7.14         | 868         | 1450          | 209.0             | Shear         |           |
| T96    | C-1700-4.60 | 200            | 500         | 4000        | 3000          | 40            | 32.1            | 1257                        | 495            | 402                          | 495             | 344                 | 0.09            | 4.60         | 1700        | 1380          | 118.0             | Shear         |           |
| T97    | C-1300-5.56 | 200            | 500         | 4000        | 3000          | 40            | 30.3            | 1257                        | 495            | 402                          | 495             | 344                 | 0.09            | 5.56         | 1300        | 1500          | 67.4              | Shear         |           |
| T98    | C-868-7.14  | 200            | 500         | 4000        | 3000          | 40            | 26.3            | 1257                        | 495            | 402                          | 495             | 344                 | 0.09            | 7.14         | 868         | 1780          | 67.9              | Shear         |           |
| T99    | D-1700-4.60 | 200            | 500         | 4000        | 3000          | 40            | 32.7            | 1257                        | 495            | 402                          | 495             | 344                 | 0.19            | 4.60         | 1700        | 1380          | 41.5              | Flexure       |           |
| T100   | D-1300-5.56 | 200            | 500         | 4000        | 3000          | 40            | 25.6            | 1257                        | 495            | 402                          | 495             | 344                 | 0.19            | 5.56         | 1300        | 1500          | 48.0              | Flexure       |           |
| T101   | D-868-7.14  | 200            | 500         | 4000        | 3000          | 40            | 25.0            | 1257                        | 495            | 402                          | 495             | 344                 | 0.19            | 7.14         | 868         | 1780          | 47.5              | Flexure-shear |           |

## Appendix 1 (Continued)

| Number | Specimen         | Geometric size |             |             |               |               | Concrete        | Longitudinal reinforcement  |                |                              |                 | Shear reinforcement |                 | Hammer       |             | Test results  |                   |               | Reference |
|--------|------------------|----------------|-------------|-------------|---------------|---------------|-----------------|-----------------------------|----------------|------------------------------|-----------------|---------------------|-----------------|--------------|-------------|---------------|-------------------|---------------|-----------|
|        |                  | $b$<br>(mm)    | $h$<br>(mm) | $l$<br>(mm) | $l_n$<br>(mm) | $a_s$<br>(mm) | $f'_c$<br>(MPa) | $A_s$<br>(mm <sup>2</sup> ) | $f_y$<br>(MPa) | $A'_s$<br>(mm <sup>2</sup> ) | $f'_y$<br>(MPa) | $f_{vy}$<br>(MPa)   | $\rho_v$<br>(%) | $V$<br>(m/s) | $M$<br>(kg) | $F_p$<br>(kN) | $S_{max}$<br>(mm) | Failure model |           |
| T102   | DR3.3_2.4-1      | 150            | 250         | 1700        | 1400          | 40            | 40.0            | 760                         | 520            | 760                          | 520             | 310                 | 0.00            | 2.43         | 300         | n/p           | 3.8               | None          | [36]      |
| T103   | DR3.3_2.4-2      | 150            | 250         | 1700        | 1400          | 40            | 40.0            | 760                         | 520            | 760                          | 520             | 310                 | 0.00            | 3.43         | 300         | n/p           | 6.9               | Shear         |           |
| T104   | DR3.3_2.4-3      | 150            | 250         | 1700        | 1400          | 40            | 40.0            | 760                         | 520            | 760                          | 520             | 310                 | 0.00            | 4.20         | 300         | n/p           | 12.7              | Shear         |           |
| T105   | DR3.3_2.4-4      | 150            | 250         | 1700        | 1400          | 40            | 40.0            | 760                         | 520            | 760                          | 520             | 310                 | 0.00            | 4.85         | 300         | n/p           | 30.0              | Shear         |           |
| T106   | DR3.3_2.4_0.12-1 | 150            | 250         | 1700        | 1400          | 40            | 40.0            | 760                         | 520            | 760                          | 520             | 310                 | 0.11            | 2.43         | 300         | n/p           | 6.4               | Shear         |           |
| T107   | DR3.3_2.4_0.12-2 | 150            | 250         | 1700        | 1400          | 40            | 40.0            | 760                         | 520            | 760                          | 520             | 310                 | 0.11            | 3.43         | 300         | n/p           | 11.5              | Shear         |           |
| T108   | DR3.3_2.4_0.12-3 | 150            | 250         | 1700        | 1400          | 40            | 40.0            | 760                         | 520            | 760                          | 520             | 310                 | 0.11            | 4.20         | 300         | n/p           | 18.2              | Shear         |           |
| T109   | DR3.3_2.4_0.12-4 | 150            | 250         | 1700        | 1400          | 40            | 40.0            | 760                         | 520            | 760                          | 520             | 310                 | 0.11            | 4.85         | 300         | n/p           | 21.6              | Shear         |           |
| T110   | DR3.3_2.4_0.56-1 | 150            | 250         | 1700        | 1400          | 40            | 40.0            | 760                         | 520            | 760                          | 520             | 310                 | 0.54            | 3.43         | 300         | n/p           | 9.0               | None          |           |
| T111   | DR3.3_2.4_0.56-2 | 150            | 250         | 1700        | 1400          | 40            | 40.0            | 760                         | 520            | 760                          | 520             | 310                 | 0.54            | 4.20         | 300         | n/p           | 13.4              | Flexure       |           |
| T112   | DR3.3_2.4_0.56-3 | 150            | 250         | 1700        | 1400          | 40            | 40.0            | 760                         | 520            | 760                          | 520             | 310                 | 0.54            | 4.85         | 300         | n/p           | 15.7              | Shear         |           |
| T113   | DR3.3_2.4_0.56-4 | 150            | 250         | 1700        | 1400          | 40            | 40.0            | 760                         | 520            | 760                          | 520             | 310                 | 0.54            | 5.60         | 300         | n/p           | 19.2              | Shear         |           |
| T114   | SR3.8_0.8-1      | 160            | 240         | 2000        | 1600          | 30            | 40.0            | 265                         | 520            | 0                            | 520             | 310                 | 0.00            | 2.43         | 300         | n/p           | 10.8              | Flexure       |           |
| T115   | SR3.8_0.8-2      | 160            | 240         | 2000        | 1600          | 30            | 40.0            | 265                         | 520            | 0                            | 520             | 310                 | 0.00            | 3.43         | 300         | n/p           | 20.2              | Flexure       |           |
| T116   | SR3.8_0.8-3      | 160            | 240         | 2000        | 1600          | 30            | 40.0            | 265                         | 520            | 0                            | 520             | 310                 | 0.00            | 4.20         | 300         | n/p           | 29.5              | Flexure       |           |
| T117   | DR3.8_0.8_0.11-1 | 160            | 240         | 2000        | 1600          | 30            | 40.0            | 265                         | 520            | 265                          | 520             | 310                 | 0.11            | 3.43         | 300         | n/p           | 18.6              | Flexure       |           |
| T118   | DR3.8_0.8_0.11-2 | 160            | 240         | 2000        | 1600          | 30            | 40.0            | 265                         | 520            | 265                          | 520             | 310                 | 0.11            | 4.20         | 300         | n/p           | 34.5              | Flexure       |           |
| T119   | DR3.8_0.8_0.11-3 | 160            | 240         | 2000        | 1600          | 30            | 40.0            | 265                         | 520            | 265                          | 520             | 310                 | 0.11            | 4.85         | 300         | n/p           | 41.0              | Flexure       |           |
| T120   | DR3.8_0.8_0.15-1 | 160            | 240         | 2000        | 1600          | 30            | 40.0            | 265                         | 520            | 265                          | 520             | 310                 | 0.15            | 3.43         | 300         | n/p           | 19.6              | Flexure       |           |
| T121   | DR3.8_0.8_0.15-2 | 160            | 240         | 2000        | 1600          | 30            | 40.0            | 265                         | 520            | 265                          | 520             | 310                 | 0.15            | 4.20         | 300         | n/p           | 28.8              | Flexure       |           |
| T122   | DR3.8_0.8_0.15-3 | 160            | 240         | 2000        | 1600          | 30            | 40.0            | 265                         | 520            | 265                          | 520             | 310                 | 0.15            | 4.85         | 300         | n/p           | 39.2              | Flexure       |           |
| T123   | SR5.7_1.6-1      | 120            | 170         | 2000        | 1600          | 30            | 40.0            | 265                         | 520            | 0                            | 520             | 310                 | 0.00            | 2.43         | 300         | n/p           | 20.0              | Flexure       |           |
| T124   | SR5.7_1.6-2      | 120            | 170         | 2000        | 1600          | 30            | 40.0            | 265                         | 520            | 0                            | 520             | 310                 | 0.00            | 2.97         | 300         | n/p           | 28.8              | Flexure       |           |
| T125   | SR5.7_1.6-3      | 120            | 170         | 2000        | 1600          | 30            | 40.0            | 265                         | 520            | 0                            | 520             | 310                 | 0.00            | 3.43         | 300         | n/p           | 37.1              | Flexure       |           |
| T126   | DR5.7_1.6_0.15-1 | 120            | 170         | 2000        | 1600          | 30            | 40.0            | 265                         | 520            | 265                          | 520             | 310                 | 0.15            | 2.43         | 300         | n/p           | 20.0              | Flexure       |           |
| T127   | DR5.7_1.6_0.15-2 | 120            | 170         | 2000        | 1600          | 30            | 40.0            | 265                         | 520            | 265                          | 520             | 310                 | 0.15            | 2.97         | 300         | n/p           | 30.0              | Flexure       |           |

## Appendix 1 (Continued)

| Number | Specimen         | Geometric size |             |             |               |               | Concrete        | Longitudinal reinforcement  |                |                              |                 | Shear reinforcement |                 | Hammer       |             | Test results  |                   |               | Reference |
|--------|------------------|----------------|-------------|-------------|---------------|---------------|-----------------|-----------------------------|----------------|------------------------------|-----------------|---------------------|-----------------|--------------|-------------|---------------|-------------------|---------------|-----------|
|        |                  | $b$<br>(mm)    | $h$<br>(mm) | $l$<br>(mm) | $l_n$<br>(mm) | $a_s$<br>(mm) | $f'_c$<br>(MPa) | $A_s$<br>(mm <sup>2</sup> ) | $f_y$<br>(MPa) | $A'_s$<br>(mm <sup>2</sup> ) | $f'_y$<br>(MPa) | $f_{vy}$<br>(MPa)   | $\rho_v$<br>(%) | $V$<br>(m/s) | $M$<br>(kg) | $F_p$<br>(kN) | $S_{max}$<br>(mm) | Failure model |           |
| T128   | DR5.7_1.6_0.15-3 | 120            | 170         | 2000        | 1600          | 30            | 40.0            | 265                         | 520            | 265                          | 520             | 310                 | 0.15            | 3.43         | 300         | n/p           | 39.1              | Flexure       | [36]      |
| T129   | DR5.7_1.6_0.20-1 | 120            | 170         | 2000        | 1600          | 30            | 40.0            | 265                         | 520            | 265                          | 520             | 310                 | 0.21            | 2.43         | 300         | n/p           | 19.1              | Flexure       |           |
| T130   | DR5.7_1.6_0.20-2 | 120            | 170         | 2000        | 1600          | 30            | 40.0            | 265                         | 520            | 265                          | 520             | 310                 | 0.21            | 2.97         | 300         | n/p           | 28.8              | Flexure       |           |
| T131   | DR5.7_1.6_0.20-3 | 120            | 170         | 2000        | 1600          | 30            | 40.0            | 265                         | 520            | 265                          | 520             | 310                 | 0.21            | 3.43         | 300         | n/p           | 37.9              | Flexure       |           |
| T132   | BD1              | 150            | 310         | 2700        | 1860          | 33            | 28.1            | 603                         | 477            | 603                          | 477             | 550                 | 0.22            | 4.15         | 253         | 891           | 12.0              | Flexure       | [39]      |
| T133   | BD2              | 150            | 310         | 2700        | 1860          | 33            | 26.9            | 603                         | 477            | 603                          | 477             | 550                 | 0.22            | 7.11         | 253         | 1396          | 24.0              | Flexure       |           |
| T134   | BD3              | 150            | 310         | 2700        | 1860          | 33            | 26.9            | 603                         | 477            | 603                          | 477             | 550                 | 0.22            | 11.96        | 253         | 1940          | 75.0              | Shear         |           |
| T135   | BD4              | 150            | 310         | 2700        | 1860          | 33            | 41.4            | 603                         | 477            | 603                          | 477             | 550                 | 0.22            | 7.81         | 578         | 1466          | 80.0              | Flexure       |           |
| T136   | BD5              | 150            | 310         | 2700        | 1860          | 33            | 41.4            | 603                         | 477            | 603                          | 477             | 550                 | 0.22            | 5.10         | 578         | 983           | 38.0              | Flexure-shear |           |
| T137   | A-1              | 100            | 250         | 3000        | 2500          | 28            | 30.0            | 402                         | 490            | 402                          | 490             | 340                 | 0.38            | 3.12         | 968         | 260           | 81.0              | Flexure       | [40]      |
| T138   | A-2              | 100            | 250         | 3000        | 2500          | 28            | 30.0            | 402                         | 490            | 402                          | 490             | 340                 | 0.38            | 4.00         | 587         | 420           | 74.0              | Flexure       |           |
| T139   | A-3              | 100            | 250         | 3000        | 2500          | 28            | 30.0            | 402                         | 490            | 402                          | 490             | 340                 | 0.38            | 5.70         | 392         | 790           | 83.6              | Flexure       |           |
| T140   | A-4              | 100            | 250         | 3000        | 2500          | 28            | 30.0            | 402                         | 490            | 402                          | 490             | 340                 | 0.38            | 8.50         | 197         | 800           | 89.5              | Flexure       |           |
| T141   | B-0-00           | 200            | 400         | 2800        | 2400          | 42.5          | 41.9            | 1473                        | 460            | 402                          | 460             | 0                   | 0.00            | 7.20         | 393         | 2014          | 142.6             | Shear         | [37]      |
| T142   | B-0-25           | 200            | 400         | 2800        | 2400          | 42.5          | 41.9            | 1473                        | 460            | 402                          | 460             | 314                 | 0.25            | 7.20         | 393         | 2214          | 31.4              | Flexure-shear |           |
| T143   | B-0-50           | 200            | 400         | 2800        | 2400          | 42.5          | 41.9            | 1473                        | 460            | 402                          | 460             | 314                 | 0.50            | 7.20         | 393         | 1948          | 20.3              | Flexure       |           |

## References

- [1] Fujikake K, Li B, Soeun S. Impact Response of Reinforced Concrete Beam and Its Analytical Evaluation. *Journal of Structural Engineering*. 2009;135(8):938-950.
- [2] Tachibana S, Masuya H, Nakamura S. Performance based design of reinforced concrete beams under impact. *Natural Hazards and Earth System Sciences*. 2010;10(6):1069-1078.
- [7] Zhao D-B, Yi W-J, Kunnath SK. Shear Mechanisms in Reinforced Concrete Beams under Impact Loading. *Journal of Structural Engineering*. 2017;143(9):04017089.
- [10] Kishi N, Mikami H. Empirical formulas for designing reinforced concrete beams under impact loading. *ACI Structural Journal-American Concrete Institute*. 2012;109(4):509-519.
- [35] Bhatti AQ, Kishi N, Mikami H, Ando T. Elasto-plastic impact response analysis of shear-failure-type RC beams with shear rebars. *Materials & Design*. 2009;30(3):502-510.
- [36] Adhikary S, Li B, Fujikake K. Low Velocity Impact Response of Reinforced Concrete Beams: Experimental and Numerical Investigation. *International Journal of Protective Structures*. 2015;6(1):81-111.
- [37] Jin L, Zhang R, Dou G, Xu J, Du X. Experimental and numerical study of reinforced concrete beams with steel fibers subjected to impact loading. *International Journal of Damage Mechanics*. 2017;1056789517721616.
- [38] Zeng X, Xu B. Experimental study on the impact-resistant behavior of RC beams without shear-resistant rebar. *China Civil Engineering Journal*. 2012; 45(9): 63-73. (In Chinese)
- [39] Xu B, Zeng X. Experimental study on the behaviours of reinforced concrete beams under impact loading. *China Civil Engineering Journal*. 2014; 47(2): 41-51. (In Chinese)
- [40] Zhao D-B, Yi W-J. Anti-impact behavior and design method for RC beams. *Journal of Vibration and Shock*, 2015, 34(11): 139-145. (In Chinese)
- [41] Dou G-Q, Du X-L, Li L. Experimental study on the behavior of high strength reinforced concrete beams under impact load. *Journal of Tianjin University(Science and technology)*. 2014; 47(12):1072-1080. (In Chinese)
